# Supplementary figures and images for: Plug‐in‐Gait calculation of the knee adduction moment in people with knee osteoarthritis during shod walking: comparison of two different foot marker models
Source: Springer Nature journal article supplement (doi:10.1186/s13047-017-0187-4), 2017-01-01

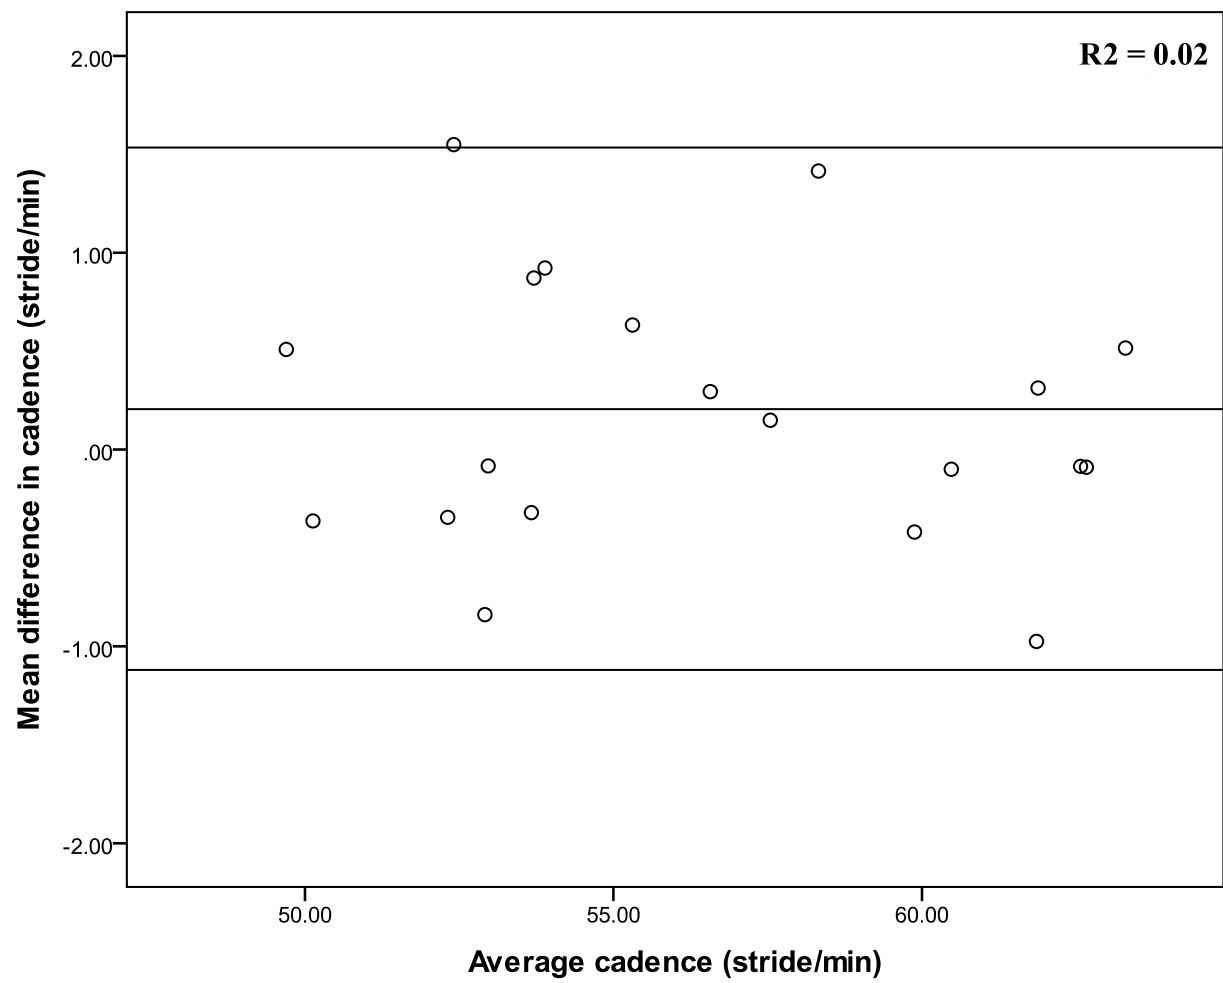

Supplement: MOESM1 [file 12045516]

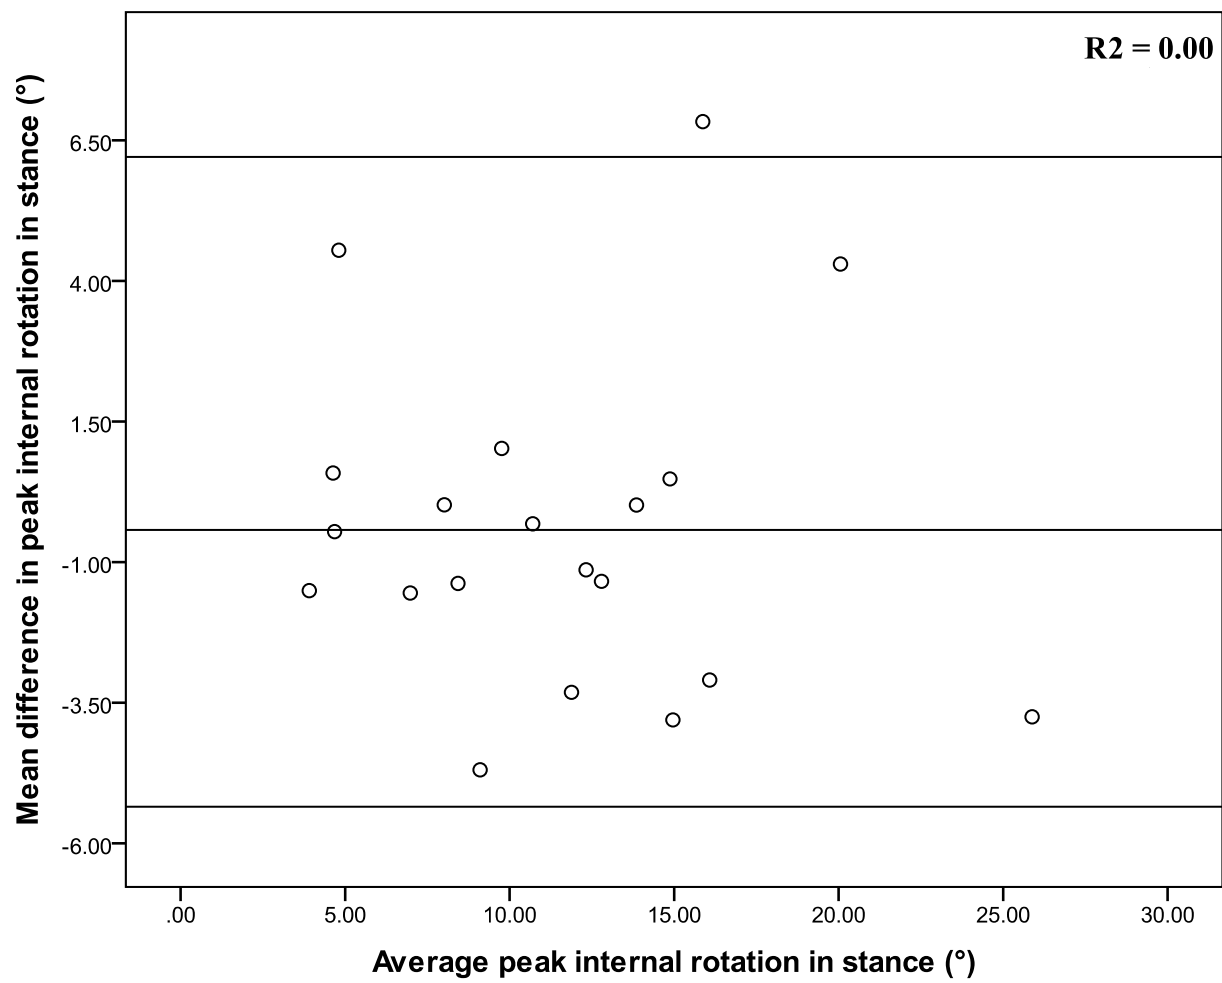

Supplement: MOESM1 [file 12045516]

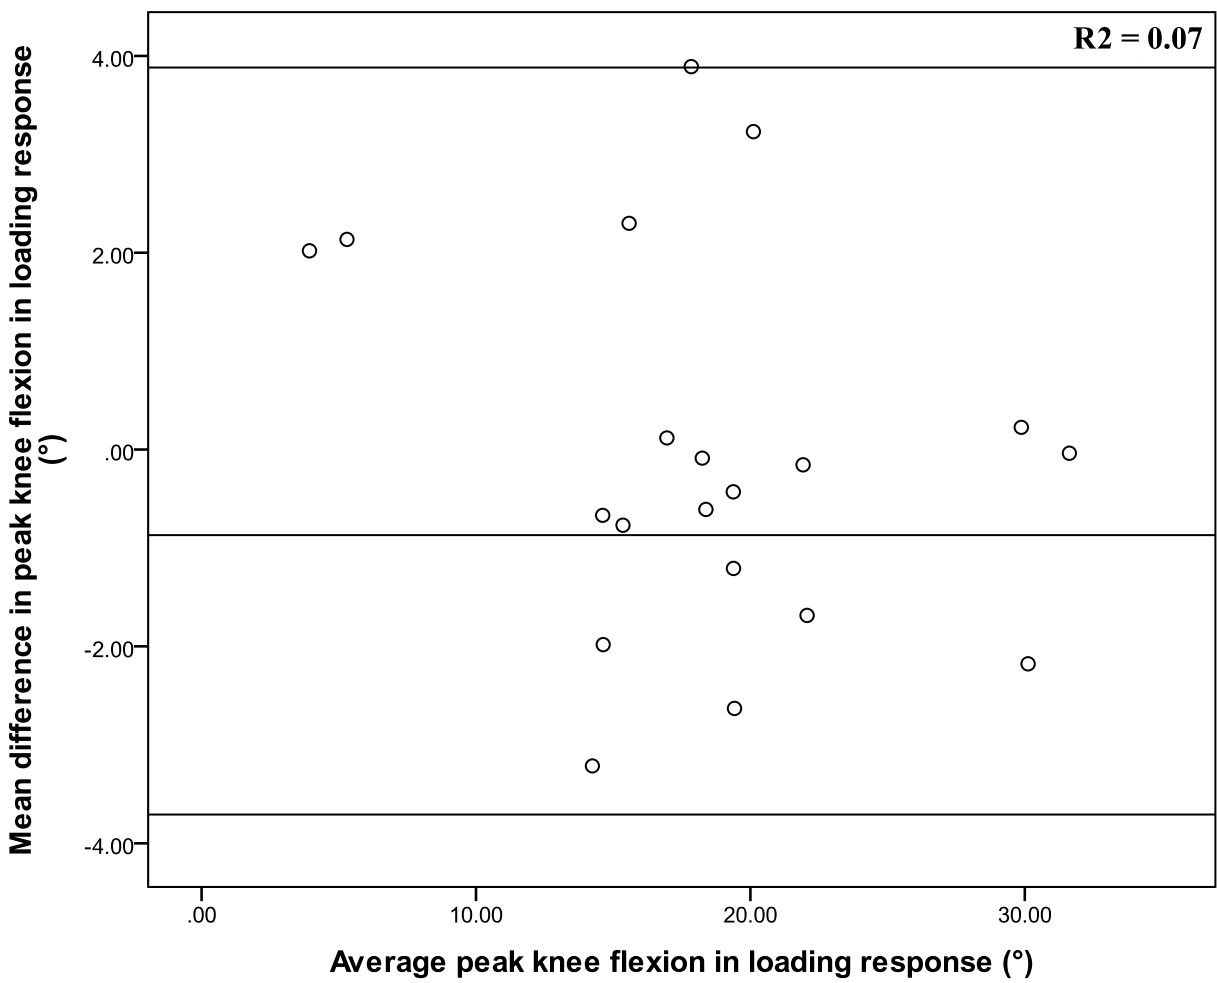

Supplement: MOESM1 [file 12045516]

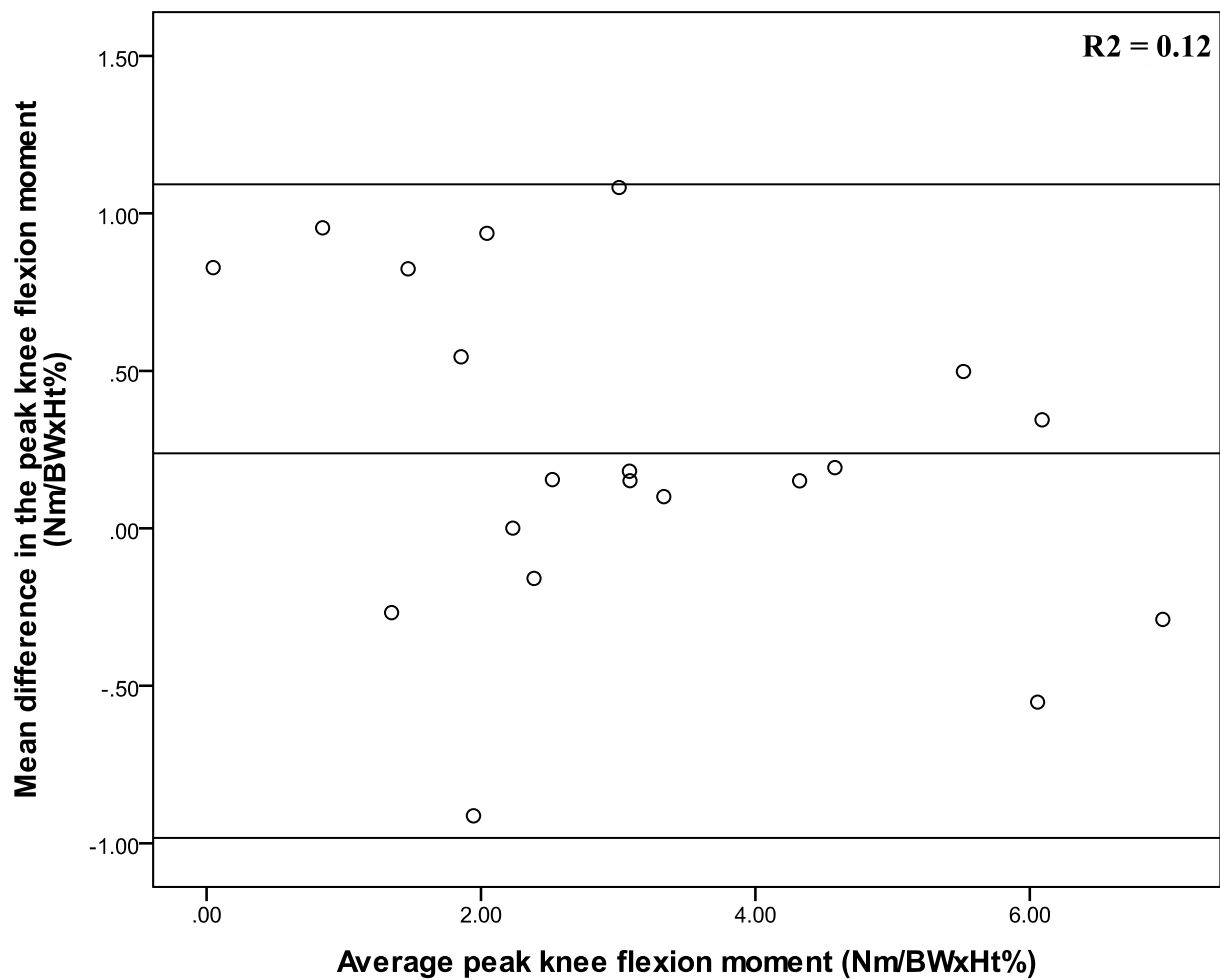

Supplement: MOESM1 [file 12045516]

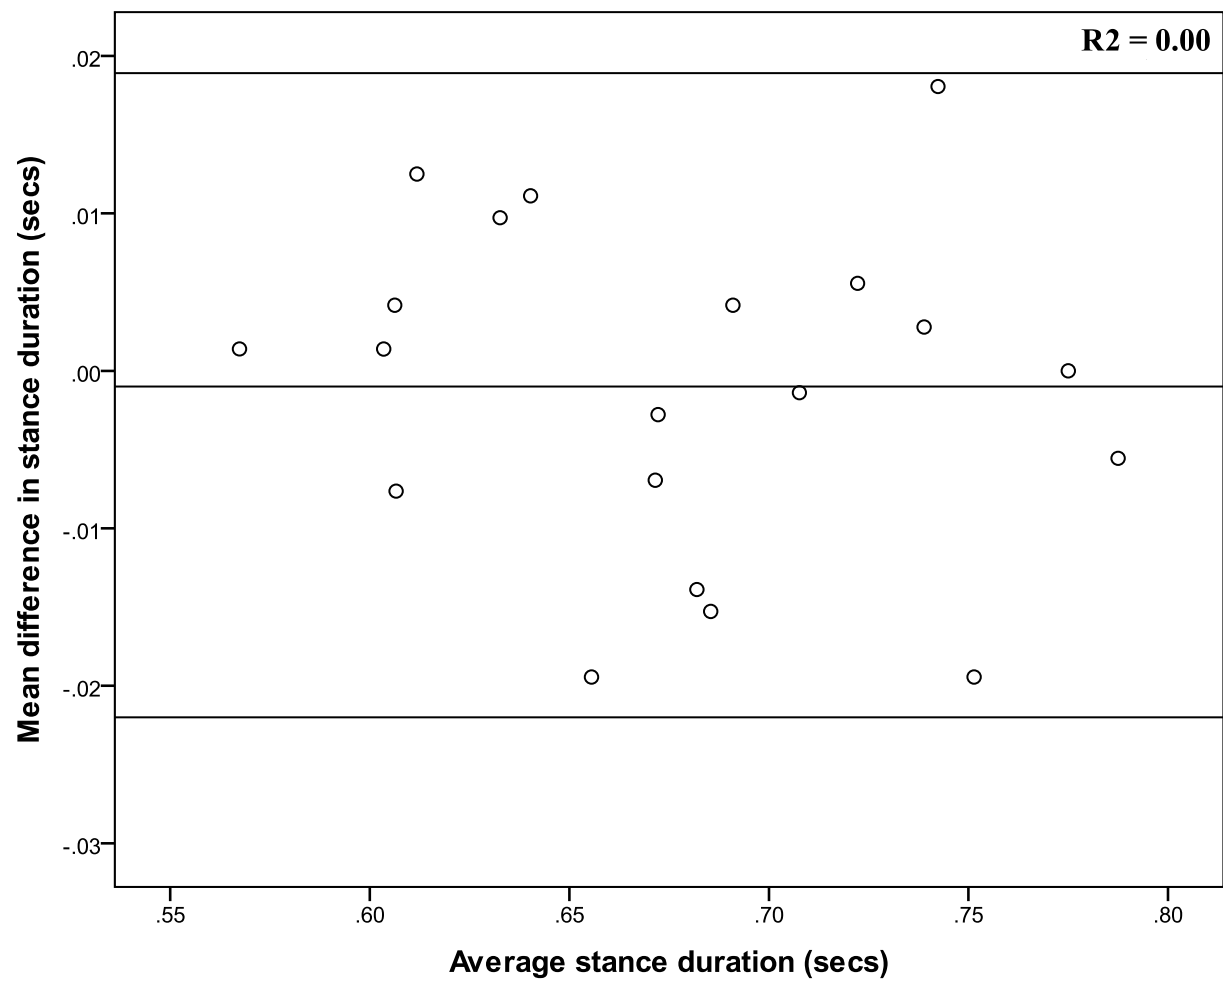

Supplement: MOESM1 [file 12045516]

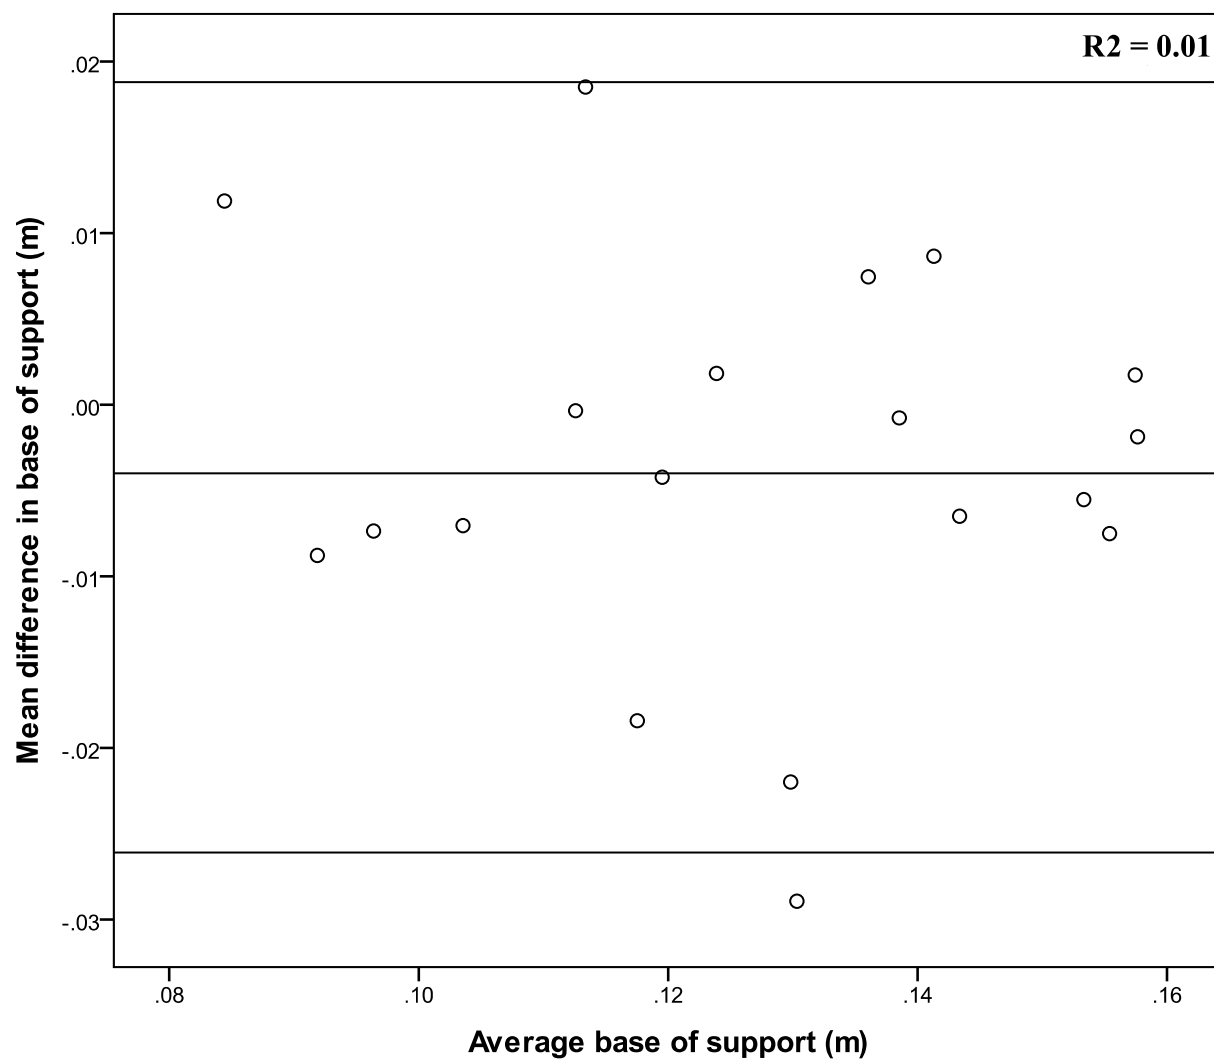

Supplement: MOESM1 [file 12045516]

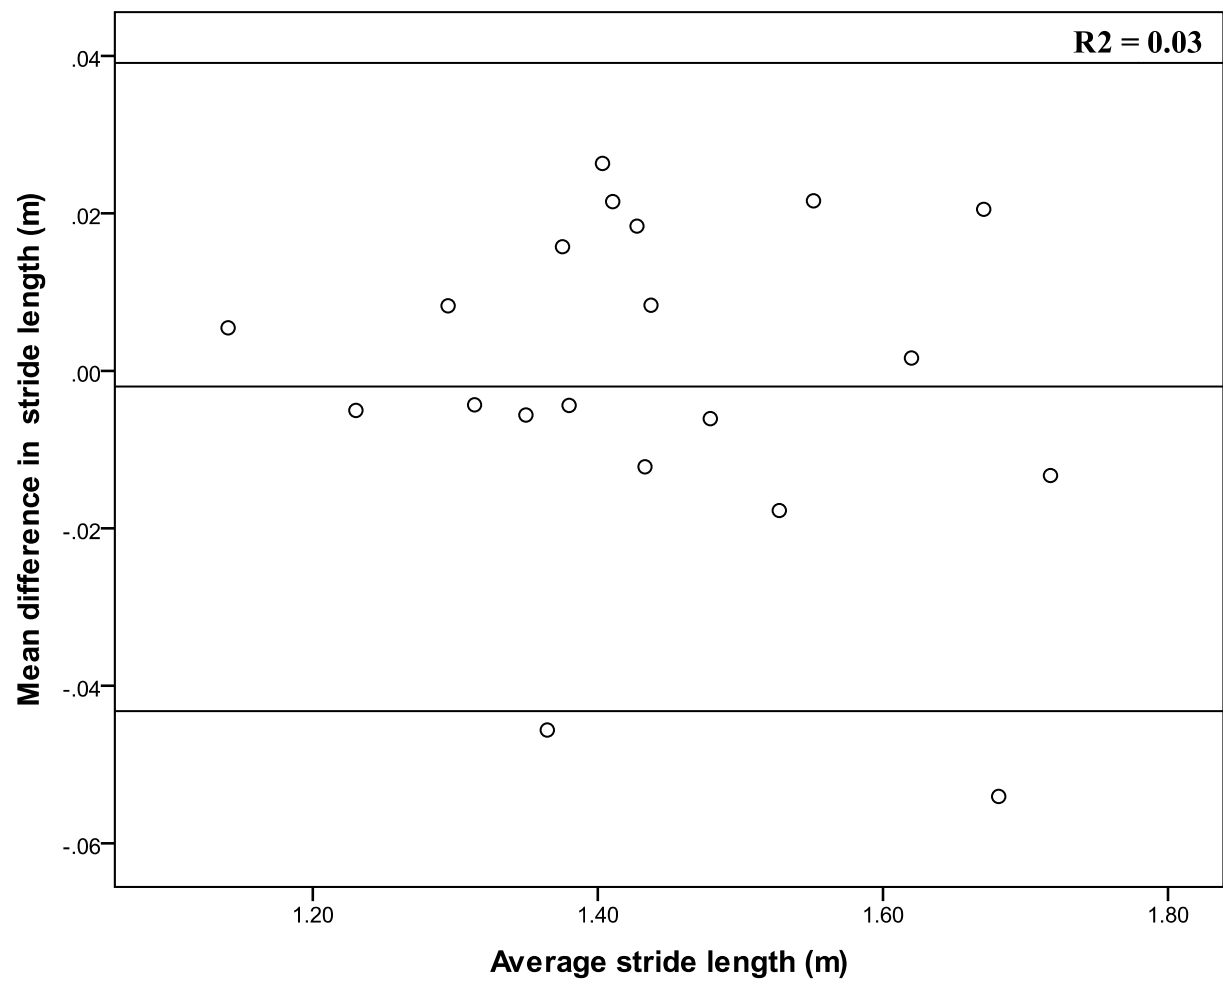

Supplement: MOESM1 [file 12045516]

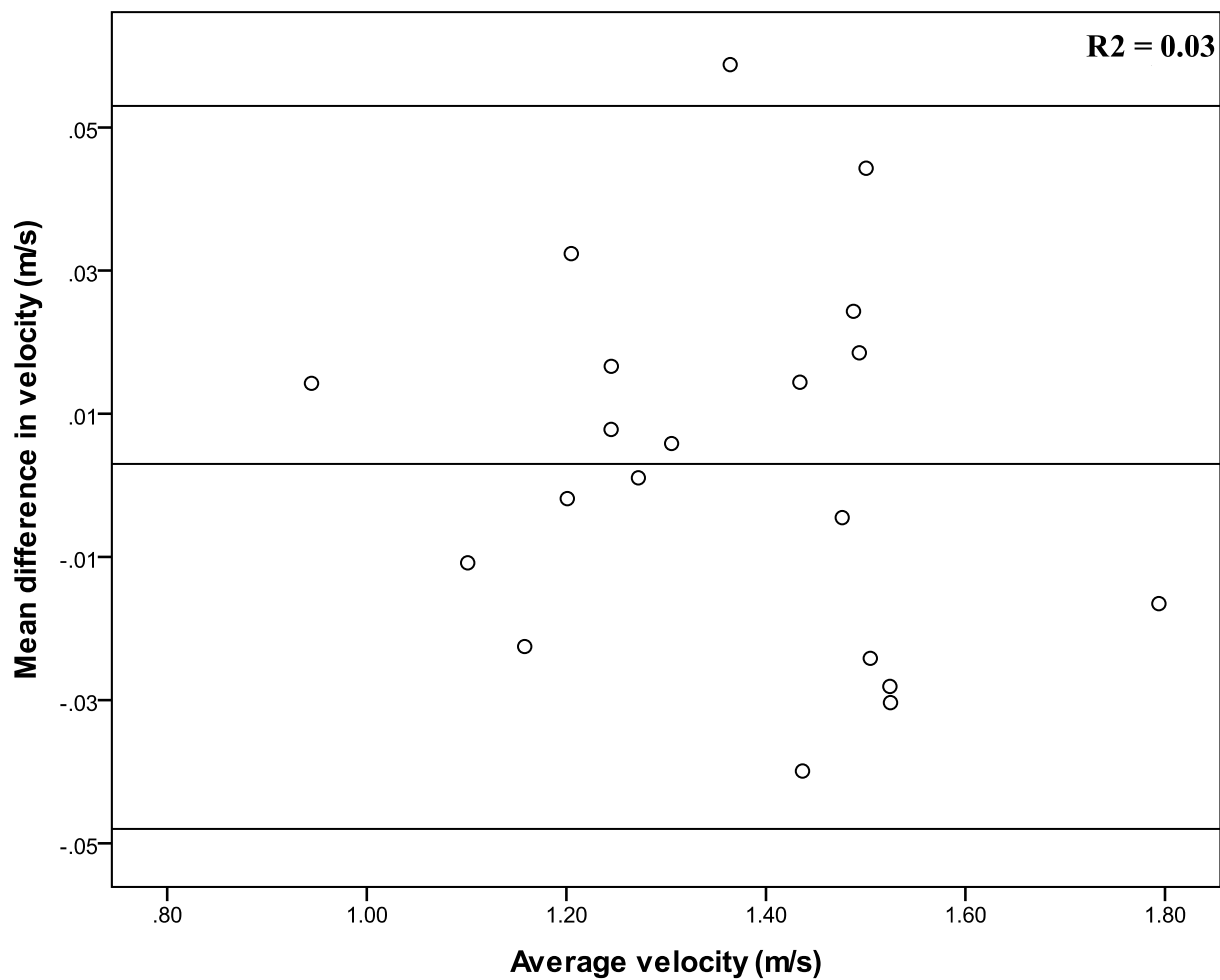

Supplement: MOESM1 [file 12045516]

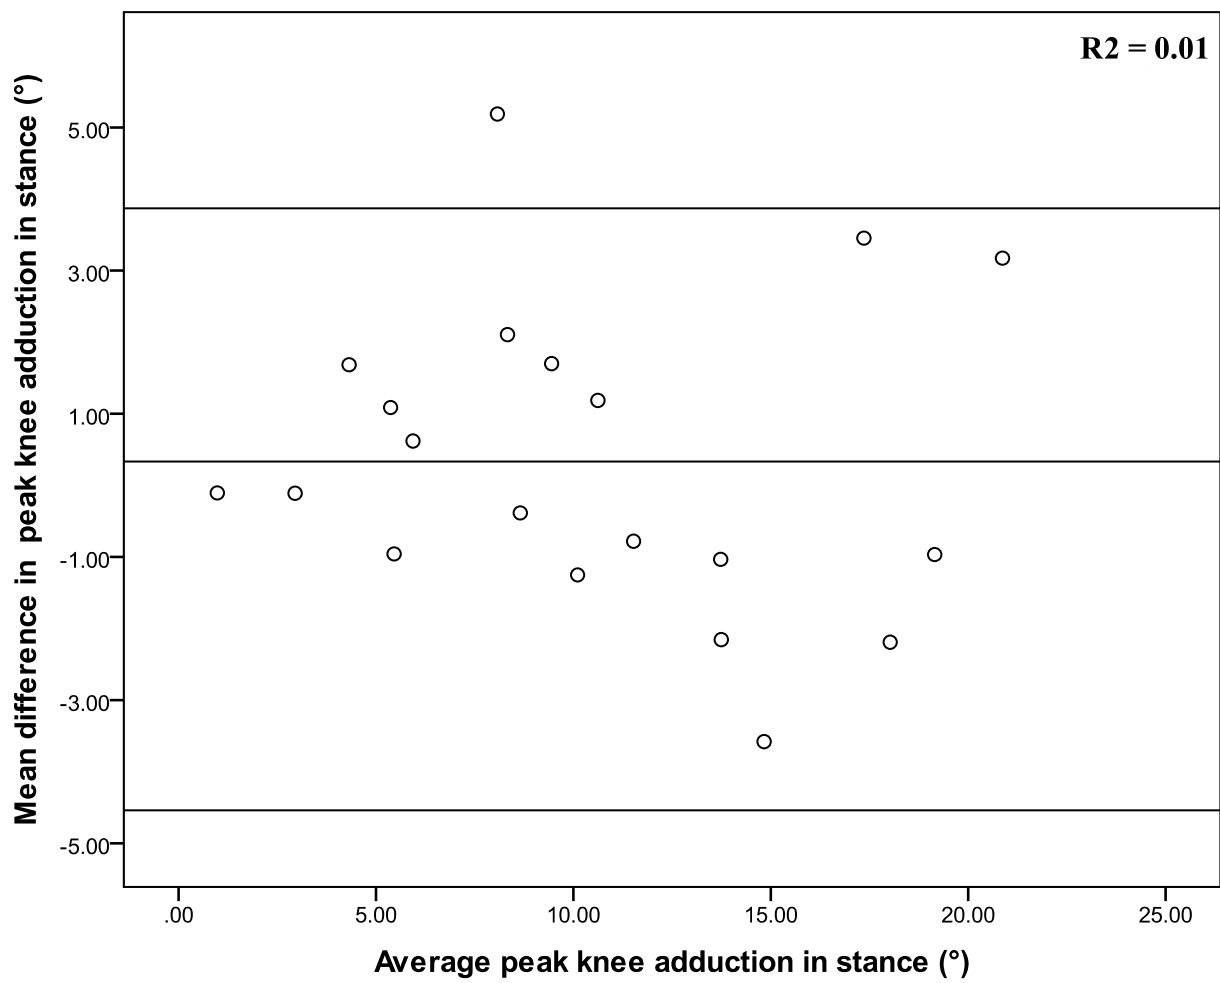

Supplement: MOESM1 [file 12045516]

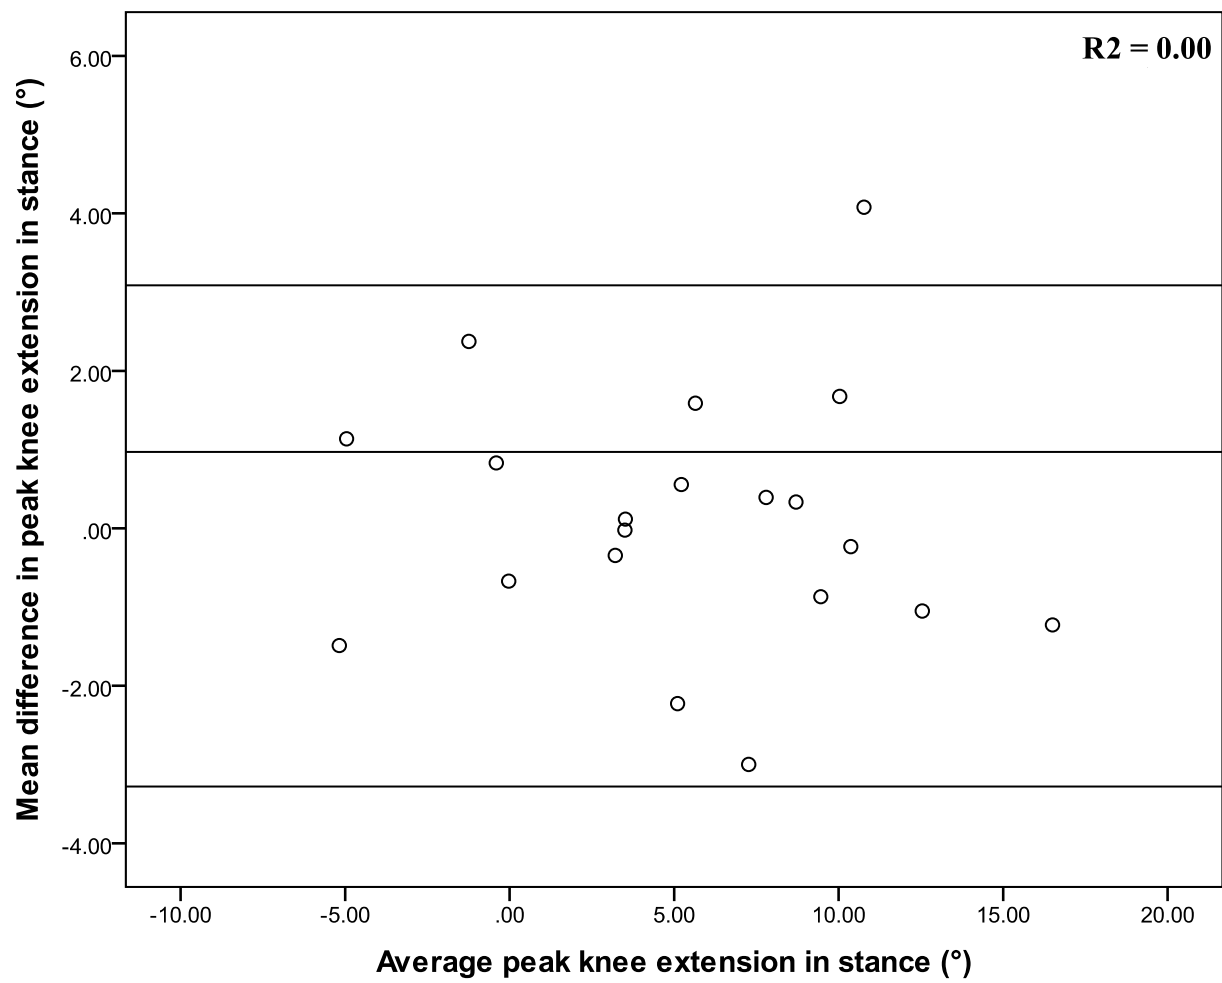

Supplement: MOESM1 [file 12045516]
